# Supplementary material for: Identification of Potential miRNA‐mRNA Regulatory Network Contributing to Parkinson’s Disease
Source: Hindawi journal article supplement (doi:10.1155/2022/2877728), 2022-01-01
Supplement: f1 [file 2877728.f1.pdf]

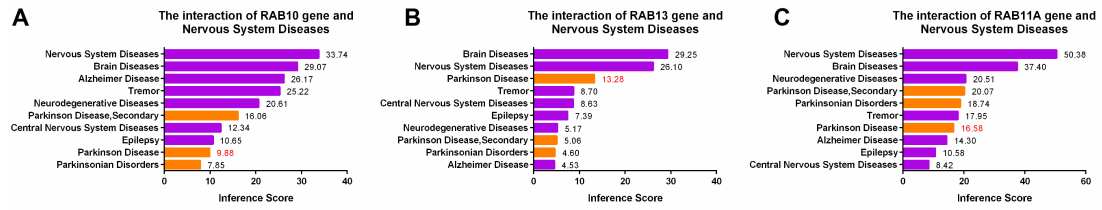

**Supplementary Figure 1 Parkinson Disease score determined by CTD.** The correlation between the genesis of PD and RAB10 (A), RAB13 (B) and RAB11A (C) was evaluated by the online tool Comparative Toxicogenomics Database (CTD), scored and showed as bar graphs.

**Supplementary Table 1. Clinical information.**

| <b>ID</b> | <b>Sex</b> | <b>Age</b> | <b>Hoehn and Yahr stage</b> |
|-----------|------------|------------|-----------------------------|
| PD-1      | Male       | 89         | 2                           |
| PD-2      | Female     | 94         | 4                           |
| PD-3      | Male       | 68         | 3                           |
| PD-4      | Female     | 93         | 4                           |
| PD-5      | Male       | 78         | 3                           |
| PD-6      | Female     | 74         | 2                           |
| PD-7      | Female     | 67         | 2                           |
| PD-8      | Male       | 69         | 4                           |
| PD-9      | Male       | 71         | 2                           |
| PD-10     | Male       | 68         | 3                           |
| PD-11     | Female     | 75         | 2                           |
| PD-12     | Male       | 57         | 4                           |
| PD-13     | Female     | 59         | 3                           |
| PD-14     | Male       | 84         | 2                           |
| PD-15     | Female     | 72         | 3                           |
| PD-16     | Male       | 68         | 3                           |
| PD-17     | Male       | 69         | 2                           |
| PD-18     | Female     | 61         | 3                           |
| PD-19     | Female     | 69         | 3                           |

---

|        |        |    |     |
|--------|--------|----|-----|
| PD-20  | Male   | 64 | 3   |
| PD-21  | Female | 66 | 2   |
| PD-22  | Female | 58 | 2   |
| PD-23  | Male   | 74 | 3   |
| CON-1  | Male   | 69 | --- |
| CON-2  | Female | 86 | --- |
| CON-3  | Female | 62 | --- |
| CON-4  | Female | 62 | --- |
| CON-5  | Male   | 90 | --- |
| CON-6  | Male   | 82 | --- |
| CON-7  | Female | 81 | --- |
| CON-8  | Female | 95 | --- |
| CON-9  | Female | 75 | --- |
| CON-10 | Male   | 61 | --- |
| CON-11 | Male   | 62 | --- |
| CON-12 | Female | 62 | --- |
| CON-13 | Male   | 63 | --- |
| CON-14 | Female | 68 | --- |
| CON-15 | Male   | 60 | --- |
| CON-16 | Male   | 61 | --- |

---

---

|        |        |    |     |
|--------|--------|----|-----|
| CON-17 | Male   | 61 | --- |
| CON-18 | Female | 64 | --- |
| CON-19 | Female | 66 | --- |
| CON-20 | Male   | 66 | --- |
| CON-21 | Male   | 67 | --- |
| CON-22 | Female | 67 | --- |
| CON-23 | Male   | 67 | --- |
| CON-24 | Female | 69 | --- |
| CON-25 | Female | 59 | --- |
| CON-26 | Male   | 64 | --- |

---
